# Supplementary material for: Metabolomics analysis of human cumulus cells obtained from cumulus–oocyte complexes with different developmental potential
Source: PubMed Central journal article supplement — Hum Reprod. 2023 Sep 11;38(11):2187–95. doi: 10.1093/humrep/dead181 (PMC10628504; doi:10.1093/humrep/dead181), 2023-09-11
Supplement: dead181_supplementary_figure_s1.pdf [file dead181_supplementary_figure_s1.pdf]

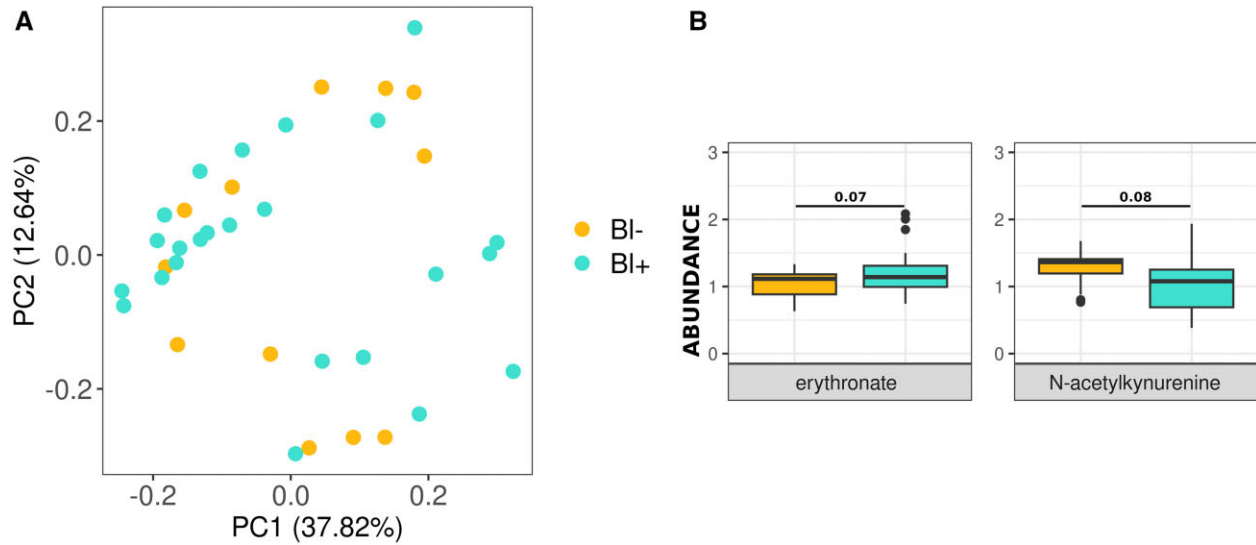

**Supplementary Figure S1. Relative abundance of biochemical compounds in cumulus cells tending to differ between two groups.** The group that was unable to develop to blastocysts (Bl-, orange) versus the group able to develop to blastocyst (Bl+, turquoise, P-, and P+ combined). Welch test P-values are indicated on each graph.
